# Supplementary material
Source: publisher figshare collection journal article supplement (https://acs.figshare.com/ndownloader/files/4332313)
Supplement: Supplementary file 1 [file 4332313]

## Supplementary Materials

Figure S1. Structures of TEMPO-substituted pargyline analogues used in this study.

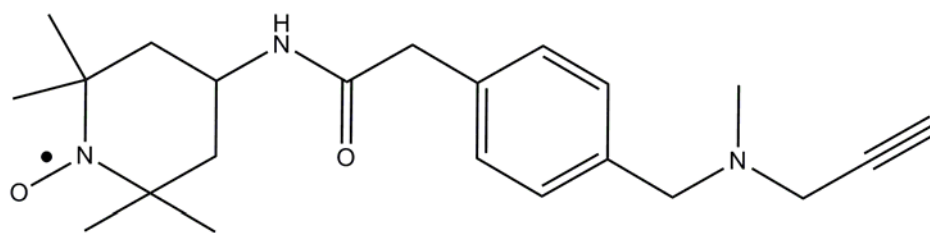

ParSL-1

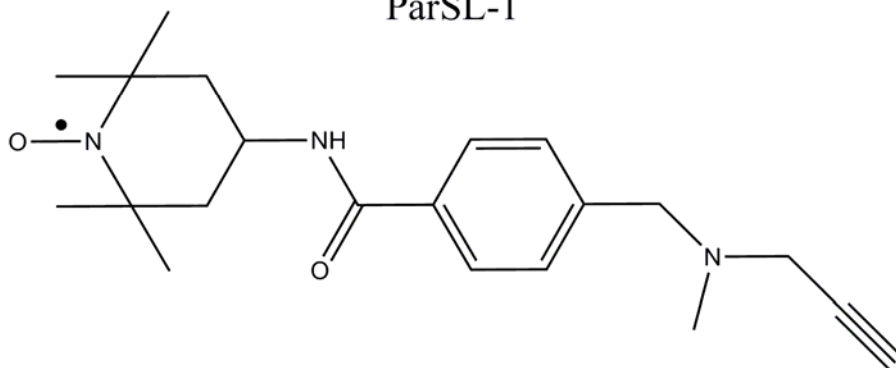

ParSL-2

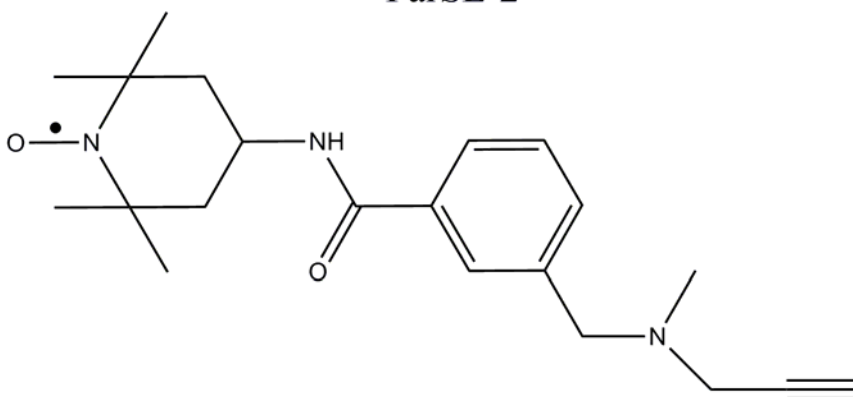

ParSL-3
